# Supplementary material
Source: PubMed Central journal article supplement (PMC8406429)
Supplement: NIHMS1723519-supplement-Suppl.pdf [file NIHMS1723519-supplement-Suppl.pdf]

**Supplementary Table 1: Individual Transplant Characteristics and Outcomes Post transplant**

| Diagnosis        | Age at HCT (years) | HCT (First or Second) | Donor | HLA match | Busulfan dosing (hours) | Busulfan AUC (mg/L × h) | Fludarabine dose | Serotherapy (Alemtuzumab or rATG, dose) | Graft source        | GVHD prophylaxis | Donor chimerism (engraftment) | Mixed chimerism (Y/N) | Donor chimerism (1 year) | Post HCT Complications                                   | Outcome Last follow up                                                       |
|------------------|--------------------|-----------------------|-------|-----------|-------------------------|-------------------------|------------------|-----------------------------------------|---------------------|------------------|-------------------------------|-----------------------|--------------------------|----------------------------------------------------------|------------------------------------------------------------------------------|
| WAS              | 1.1                | First                 | URD   | 10/10     | q12                     | 62                      | 180 mg/m2        | ALTMB, 0.5mg/kg                         | BM                  | CSA/MMF          | 99% WB                        | N                     | 99% WB                   | Grade 1 acute GVHD, Norovirus, C.diff infection          | A & W, 51 months, off IS                                                     |
| WAS              | 6.0                | First                 | URD   | 10/10     | q12                     | 63                      | 180 mg/m2        | ALTMB, 0.5mg/kg                         | BM                  | CSA/MMF/MV       | 100% WB                       | N                     | 100% WB                  | CMV viremia                                              | A & W, 29 months, off IS                                                     |
| WAS              | 1.3                | First                 | URD   | 9/10      | q12                     | 63                      | 180 mg/m2        | ALTMB, 0.5mg/kg                         | BM                  | CSA/MMF          | 100% WB                       | N                     | 100% WB                  | Grade 3 acute GVHD, CMV, EBV viremia, TMA, BO, GBS, ITP  | Died (day+ 562) due to GVHD, BO                                              |
| Primary HLH      | 3.6                | Second                | URD   | 10/10     | q12                     | 62                      | 180 mg/m2        | ALTMB, 0.5mg/kg                         | BM                  | CSA/MMF          | 100% WB                       | N                     | 100% WB                  | None                                                     | A & W, 35 months, off IS                                                     |
| WAS              | 0.9                | First                 | URD   | 10/10     | q12                     | 62                      | 180 mg/m2        | ALTMB, 0.5mg/kg                         | BM                  | CSA/MMF          | 100% WB                       | N                     | 98% WB                   | VZV infection                                            | A & W, 49 months, off IS                                                     |
| IFNGR1 Def.      | 1.1                | First                 | URD   | 10/10     | q12                     | 62                      | 180 mg/m2        | ALTMB, 0.5mg/kg                         | BM                  | CSA/MMF          | 100% WB                       | N                     | 100% WB                  | Norovirus, CMV viremia, Grade 2 acute GVHD, BCGosis      | A & W, 13 months, off IS                                                     |
| Primary HLH      | 2.3                | Second                | MSD   | 10/10     | q12                     | 62                      | 180 mg/m2        | ALTMB, 0.5mg/kg                         | BM                  | CSA/MMF          | 100% WB                       | Y                     | 100% Myeloid 45% T-cell  | CMV viremia, C. diff infection                           | A & W, 41 months, off IS, on IVIG                                            |
| WAS              | 5.8                | First                 | MSD   | 10/10     | q12                     | 63                      | 180 mg/m2        | ALTMB, 0.5mg/kg                         | BM                  | CSA/MMF          | 100% WB                       | N                     | 99% WB                   | CMV viremia                                              | A & W, 28 months, off IS                                                     |
| CD40 Ligand Def. | 0.8                | First                 | MSD   | 10/10     | q12                     | 63                      | 180 mg/m2        | ALTMB, 0.5mg/kg                         | BM                  | CSA/MMF          | 100% WB                       | Y                     | 97% Myeloid 79% T-cell   | None                                                     | A & W, 39 months, off IS                                                     |
| WAS              | 1.4                | First                 | URD   | 10/10     | q12                     | 62                      | 180 mg/m2        | ALTMB, 0.5mg/kg                         | BM                  | CSA/MMF          | 100% WB                       | N                     | 100% WB                  | Norovirus infection                                      | A & W, 25 months, off IS                                                     |
| IPEX             | 0.5                | First                 | URD   | 10/10     | q12                     | 62                      | 180 mg/m2        | ALTMB, 0.5mg/kg                         | BM                  | Pred/Tacro       | 99% WB                        | N                     | 99% WB                   | Autoimmune hemolytic anemia                              | A & W, 33 months, off IS                                                     |
| CD40 Ligand Def. | 0.8                | First                 | MSD   | 10/10     | q12                     | 62                      | 180 mg/m2        | ALTMB, 0.5mg/kg                         | BM                  | CSA/MMF          | 100% WB                       | Y                     | 100% Myeloid 93% T-cell  | CMV/EBV viremia                                          | A & W, 31 months, off IS                                                     |
| CD40 Ligand Def. | 12.8               | First                 | URD   | 10/10     | q12                     | 62                      | 180 mg/m2        | ALTMB, 0.5mg/kg                         | BM                  | CSA/MMF          | 100% WB                       | N                     | NA                       | Adenovirus encephalitis, progressive neurodegeneration   | Died (day+ 51) due to progressive neurodegeneration, adenovirus encephalitis |
| Primary HLH      | 1.9                | Second                | URD   | 9/10      | q12                     | 62                      | 180 mg/m2        | ALTMB, 0.5mg/kg                         | BM                  | CSA/MMF/ABT      | 100% WB                       | N                     | NA                       | DAH, TMA, CMV/EBV viremia                                | Died (day+ 52) due to DAH                                                    |
| WAS              | 0.7                | First                 | URD   | 10/10     | q12                     | 63                      | 180 mg/m2        | ALTMB, 0.5mg/kg                         | BM                  | CSA/MMF          | 100% WB                       | N                     | 100% WB                  | None                                                     | A & W, 18 months, off IS                                                     |
| WAS              | 0.6                | First                 | URD   | 10/10     | q12                     | 60                      | 180 mg/m2        | ALTMB, 0.5mg/kg                         | BM                  | CSA/MMF          | 100% WB                       | N                     | 100% WB                  | Mild chronic skin GVHD, GBS, Autoimmune hemolytic anemia | A & W, 26 months, off IS                                                     |
| CD40 Ligand Def. | 16.4               | First                 | URD   | 9/10      | q12                     | 63                      | 180 mg/m2        | ALTMB, 0.5mg/kg                         | BM                  | CSA/MMF/MV       | 100% WB                       | N                     | NA                       | IPS, CMV viremia                                         | Died (day+ 56) due to IPS                                                    |
| Primary HLH      | 1.9                | Second                | URD   | 10/10     | q12                     | 63                      | 180 mg/m2        | ALTMB, 0.5mg/kg                         | BM                  | CSA/MMF          | 99% WB                        | Y                     | 95% WB                   | Grade 1 acute GVHD                                       | A & W, 25 months, off IS                                                     |
| IL-10Rb Def.     | 0.5                | First                 | URD   | 10/10     | q12                     | 61                      | 180 mg/m2        | ALTMB, 0.5mg/kg                         | CD34+ selected PBSC | None             | 100% WB                       | Y                     | 33% Myeloid 80% T-cell   | Norovirus infection                                      | A & W, 24 months, off IS                                                     |
| XLP              | 2.0                | First                 | UCB   | 8/10      | q12                     | 60                      | 180 mg/m2        | ALTMB, 0.5mg/kg                         | Cord                | CSA/MMF          | 35% WB                        | Y                     | NA                       | EBV viremia                                              | Secondary graft failure (day+48)                                             |
| WAS              | 0.3                | First                 | MSD   | 10/10     | q12                     | 63                      | 180 mg/m2        | ALTMB, 0.5mg/kg                         | BM                  | CSA/MMF          | 91% WB                        | Y                     | 92% Myeloid 90% T-cell   | Grade 1 acute GVHD                                       | A & W, 18 months, off IS                                                     |
| LAD type III     | 0.8                | First                 | MMRD  | 8/10      | q12                     | 61                      | 180 mg/m2        | ALTMB, 0.5mg/kg                         | CD34+ selected PBSC | None             | 97% WB                        | Y                     | 100% Myeloid 92% T-cell  | Adenoviremia                                             | A & W, 18 months, off IS, on IVIG                                            |
| XLP              | 5.1                | Second                | MUD   | 9/10      | q12                     | 60                      | 180 mg/m2        | ALTMB, 0.5mg/kg                         | BM                  | CSA/MMF/ABT      | NA                            | NA                    | NA                       | None                                                     | Primary graft failure (day+34)                                               |
| Primary HLH      | 15.4               | Second                | MSD   | 10/10     | q12                     | 60                      | 180 mg/m2        | ALTMB, 1.0 mg/kg                        | PBSC                | CSA/MMF          | 100% WB                       | NA                    | NA                       | DAH, CMV infection                                       | Died (day+ 63) due to DAH                                                    |
| Primary HLH      | 19.8               | Second                | MSD   | 10/10     | q12                     | 62                      | 180 mg/m2        | ALTMB, 1.0mg/kg                         | PBSC                | CSA/MMF          | 98% WB                        | N                     | 100% WB                  | moderate chronic GVHD (myositis)                         | A & W, 17 months, off IS, on IVIG                                            |

**Supplementary Table 1 (continued) : Individual Transplant Characteristics and Outcomes Post transplant**

| Diagnosis        | Age at HCT (years) | HCT (First or Second) | Donor | HLA match | Busulfan dosing (hours) | Busulfan AUC (mg/L x h) | Fludarabine dose | Serotherapy (Alemtuzumab or rATG, dose) | Graft source | GVHD prophylaxis | Donor chimerism (engraftment) | Mixed chimerism (Y/N) | Donor chimerism (1 year)    | Post HCT Complications                      | Outcome Last follow up                       |
|------------------|--------------------|-----------------------|-------|-----------|-------------------------|-------------------------|------------------|-----------------------------------------|--------------|------------------|-------------------------------|-----------------------|-----------------------------|---------------------------------------------|----------------------------------------------|
| X-SCID           | 3.0                | First                 | MUD   | 10/10     | q24                     | 57                      | 180 mg/m2        | ALTMB, 0.5mg/kg                         | BM           | CSA/MMF          | 100% WB                       | Y                     | 33% Myeloid<br>94% T-cell   | None                                        | A & W, 27 months, off IS                     |
| WAS              | 15.0               | First                 | MUD   | 10/10     | q6                      | 64                      | 150 mg/m2        | ALTMB, 0.5mg/kg                         | BM           | CSA/MMF          | 100% WB                       | Y                     | 45% Myeloid<br>92% T-cell   | Adenoviremia                                | A & W, 35 months, off IS                     |
| CD40 Ligand Def. | 3.5                | First                 | MSD   | 10/10     | q24                     | 60                      | 160 mg/2         | rATG, 7.5mg/kg                          | BM           | CSA/MMF          | 100% Myeloid<br>5% T-cell     | Y                     | 100% Myeloid<br>85% T-cell  | None                                        | A & W, 32 months, off IS                     |
| IPEX             | 17.0               | First                 | MUD   | 10/10     | q24                     | 63                      | 160 mg/m2        | rATG, 7.5mg/kg                          | BM           | CSA/MMF          | 100% Myeloid<br>20% T-cell    | Y                     | 100% Myeloid<br>76% T-cell  | None                                        | A & W, 48 months, off IS                     |
| Primary HLH      | 2.3                | Second                | MSD   | 10/10     | q24                     | 63                      | 160 mg/m2        | ALTMB, 0.3mg/kg                         | BM           | CSA/MMF          | 100% Myeloid.<br>73% T-cell   | Y                     | 100% Myeloid<br>100% T-cell | SOS, grade 1 acute GVHD                     | A & W, 44 months, off IS                     |
| WAS              | 0.8                | First                 | MUD   | 10/10     | q24                     | 61                      | 160 mg/2         | ALTMB, 0.5mg/kg                         | BM           | CSA/MMF          | 100% Myeloid<br>51% T-cell    | Y                     | 100% Myeloid<br>62% T-cell  | Grade 1 acute GVHD                          | A & W, 44 months, off IS                     |
| SCN              | 1.4                | First                 | MUD   | 10/10     | q24                     | 63                      | 160 mg/m2        | ALTMB, 0.5mg/kg                         | BM           | CSA/MMF          | 100% Myeloid<br>8% T-cell     | Y                     | 99% Myeloid<br>53% T-cell   | AIHA, pancytopenia, secondary graft failure | Secondary graft failure (12 months post HCT) |
| WAS/XLT          | 2.3                | First                 | MUD   | 10/10     | q24                     | 73                      | 160 mg/m2        | ALTMB, 0.5mg/kg                         | BM           | CSA/MMF          | 100% Myeloid<br>61% T-cell    | Y                     | 100% Myeloid<br>95% T-cell  | Grade 1 acute GVHD                          | A & W, 28 months, off IS                     |
| XLP              | 9.0                | First                 | MUD   | 10/10     | q24                     | 65                      | 160 mg/2         | None                                    | BM           | CSA/MMF          | 100% Myeloid<br>15% T-cell    | Y                     | 100% Myeloid<br>89% T-cell  | None                                        | A & W, 51 months, off IS                     |
| VEOIBD           | 11.0               | First                 | MUD   | 10/10     | q24                     | 72                      | 160 mg/m2        | None                                    | BM           | CSA/MMF/MV       | 100% Myeloid<br>100% T-cell   | Y                     | 100% Myeloid<br>87% T-cell  | None                                        | A & W, 24 months, off IS                     |
| CID              | 14.0               | First                 | MMRD  | 5/10      | q24                     | 69                      | 160 mg/m2        | rATG, 7.5mg/kg                          | BM           | CSA/MMF          | 100% Myeloid<br>16% T-cell    | Y                     | 100% Myeloid<br>66% T-cell  | None                                        | A & W, 21 months, off IS                     |
| CD40 Ligand Def. | 2.0                | First                 | MUD   | 10/10     | q24                     | 68                      | 160 mg/2         | rATG, 7.5mg/kg                          | BM           | CSA/MMF          | 100% Myeloid<br>17% T-cell    | Y                     | 100% Myeloid<br>59% T-cell  | Grade 1 acute GVHD                          | A & W, 14 months, off IS                     |
| CD40 Ligand Def. | 0.8                | First                 | MUD   | 10/10     | q24                     | 65                      | 160 mg/m2        | rATG, 7.5mg/kg                          | BM           | CSA/MMF          | 97% Myeloid<br>27% T-cell     | Y                     | 97% Myeloid<br>46% T-cell   | None                                        | A & W, 18 months, on IS, on IVIG             |
| MSN1             | 2.5                | First                 | MUD   | 10/10     | q24                     | 67                      | 160 mg/m2        | rATG, 7.5mg/kg                          | BM           | CSA/MMF          | 100% Myeloid<br>92% T-cell    | Y                     | 100% Myeloid<br>100% T-cell | Grade 2 acute GVHD                          | A & W, 14 months, off IS, on IVIG            |
| CID              | 18.0               | First                 | MSD   | 10/10     | q24                     | 74                      | 160 mg/2         | rATG, 7.5mg/kg                          | BM           | CSA/MMF          | 100% Myeloid<br>26% T-cell    | Y                     | 100% Myeloid<br>100% T-cell | Grade 2 acute GVHD                          | A & W, 14 months, on IS                      |
| CTLA4 def.       | 13.0               | First                 | MSD   | 10/10     | q24                     | 69                      | 160 mg/m2        | ALTMB, 0.5mg/kg                         | BM           | CSA/MMF          | 100% Myeloid<br>21% T-cell    | Y                     | 100% Myeloid<br>22% T-cell  | None                                        | A & W, 14 months, on IS                      |

WAS – Wiskott-Aldrich Syndrome, XLT- X-linked thrombocytopenia, HLH- Hemophagocytic Lymphohistiocytosis, XLP- X-linked lymphoproliferative disorder, IFNGR1 def. – Interferon gamma receptor type 1 deficiency, X-SCID – X-linked Severe Combined Deficiency, IPEX- Immunodysregulation polyendocrinopathy enteropathy X-linked syndrome, VEOIBD – Very Early Onset Inflammatory Bowel Disease, MSN1 – X-linked primary immunodeficiency associated with hemizygous mutations in the moesin gene, CID – Combined Immune Deficiency, LAD type III – Leukocyte adhesion deficiency type III, HCT- Hematopoietic cell transplant, MSD – matched sibling donor, MUD - matched unrelated donor, MMUD – mismatched unrelated donor, MMRD - mismatched unrelated donor, UCB – Umbilical Cord Blood, ALTMB – alemtuzumab, rATG – Rabbit ATG, BM – Bone marrow, PBSC – Peripheral blood stem cells, CSA – Cyclosporine, MMF – mycophenolate, MV – maraviroc, ABT – abatacept, GVHD – Graft versus host disease, DAH – Diffuse alveolar hemorrhage, SOS – Sinusoidal obstruction syndrome, IPS – Idiopathic pneumonia syndrome, BO – Bronchiolitis obliterans, GBS – Guillaine-Barre syndrome, ITP – Immune thrombocytopenic purpura, WB – whole blood, A & W – alive and well, IS – immune suppression, IVIG – intravenous immunoglobulin, Y=yes, N=no.
